# Supplementary material for: Spontaneous thermal crosslinking of a sydnone-containing side-chain polymer with maleimides through a convergent [3 + 2] dual cycloaddition/cycloreversion process for electro-optics
Source: Royal Society of Chemistry journal article supplement (doi:10.1039/c3py00694h), 2013-01-01
Supplement: c3py00694h.pdf [file c3py00694h.pdf]

## Electronic Supporting Information

### Spontaneous Thermal Crosslinking of A Sydnone-Containing Side-Chain Polymer with Bis- and Tris-maleimides through A Merged [3+2] Dual-Cycloaddition-Cycloreversion Process for Electro-Optics

Wei Huang,<sup>a,b</sup> Zhian Jin,<sup>a</sup> Zhengwei Shi,<sup>a</sup> Jeremy J. Intemann,<sup>a</sup> Ming Li,<sup>a,c</sup> Jingdong Luo<sup>a</sup> and Alex K-Y. Jen<sup>a</sup>

<sup>a</sup>Department of Materials Science and Engineering, University of Washington, Seattle, Washington, 98195-2120, United States

<sup>b</sup>Department of Chemistry, East China Normal University, 500 Dongchuan Road, Shanghai 200241, China

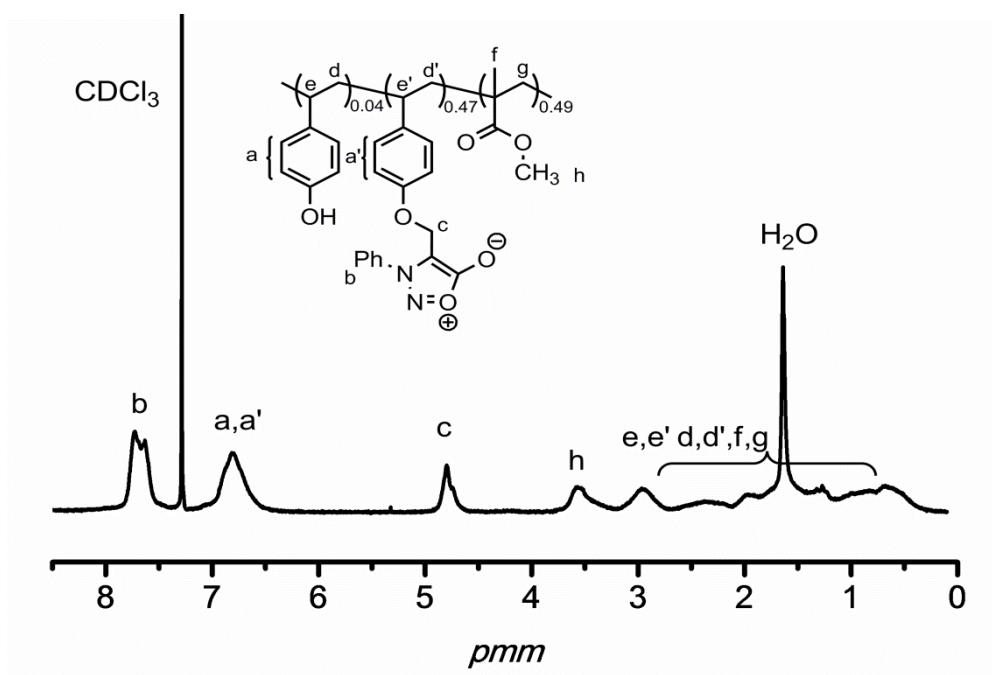

Figure S1. <sup>1</sup>H NMR spectrum of SCP in CDCl<sub>3</sub>.

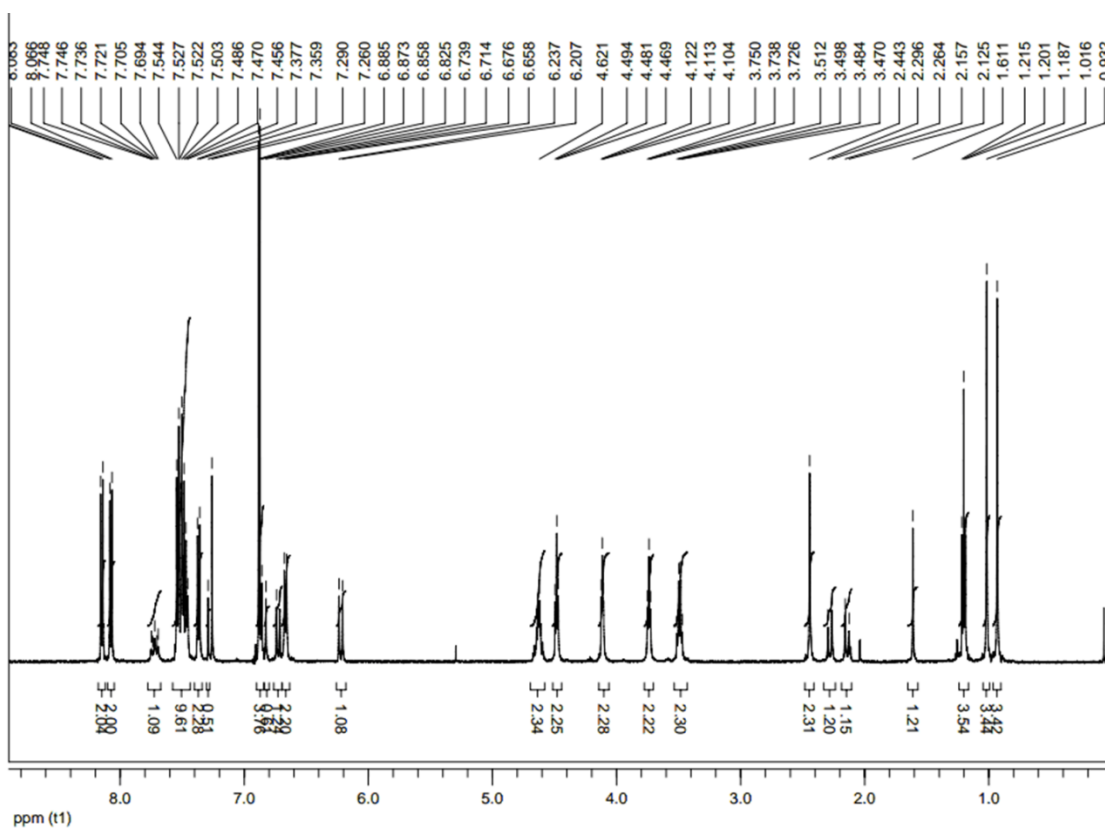

Figure S2.  $^1\text{H}$  NMR spectrum of **BMI-2** in  $\text{CDCl}_3$ .

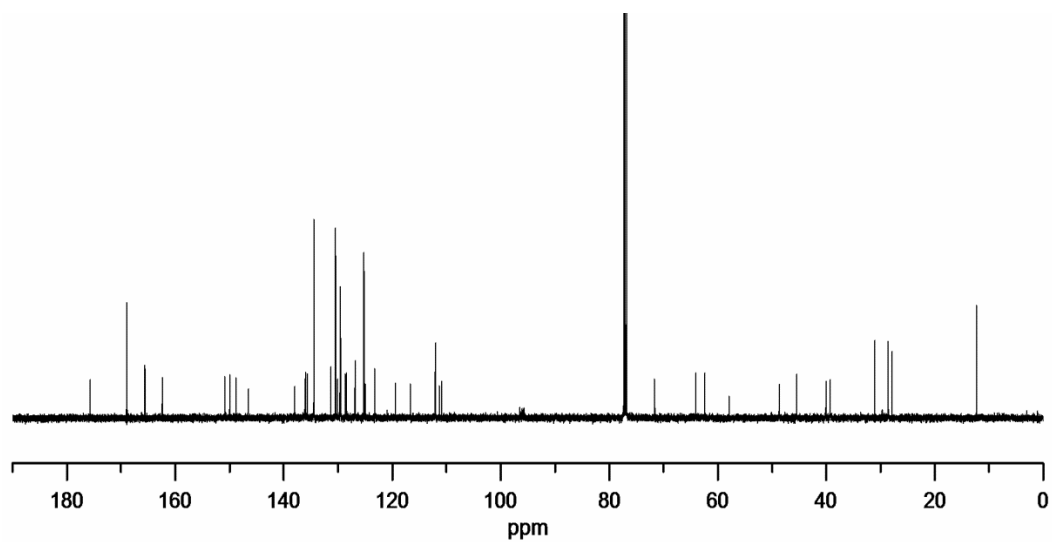

Figure S3.  $^{13}\text{C}$  NMR spectrum of chromophore (**BMI-2**) in  $\text{CDCl}_3$ .

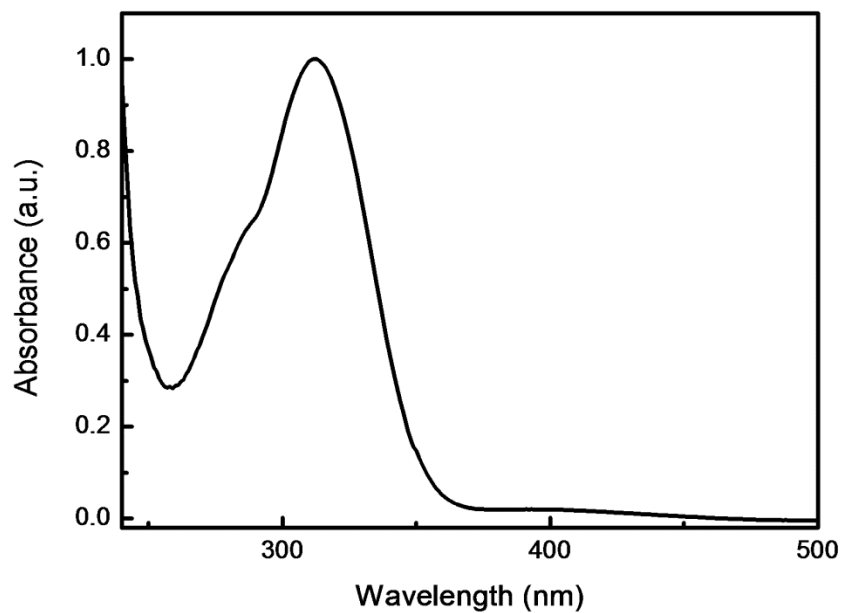

**Figure S4.** UV-*vis* absorption spectrum of SCP.

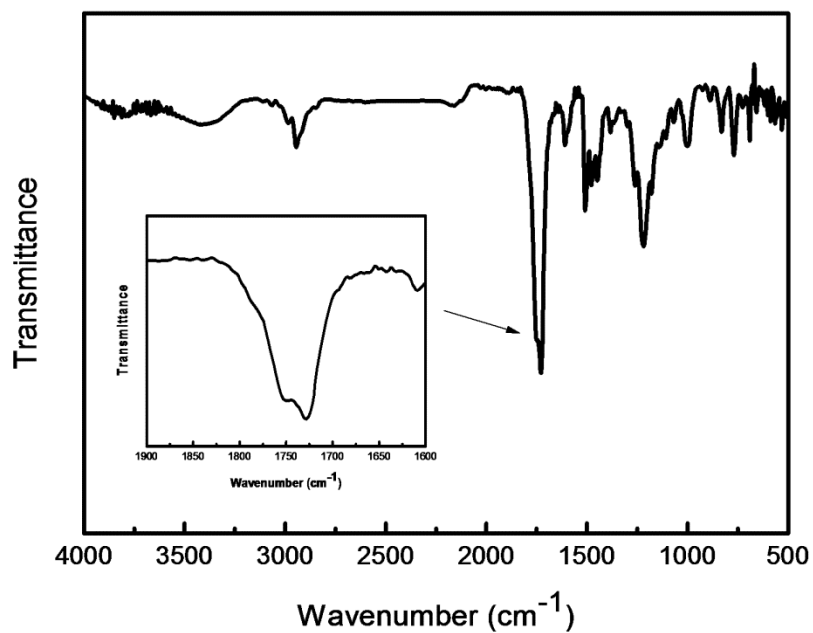

**Figure S5.** FT-IR spectrum of SCP film.

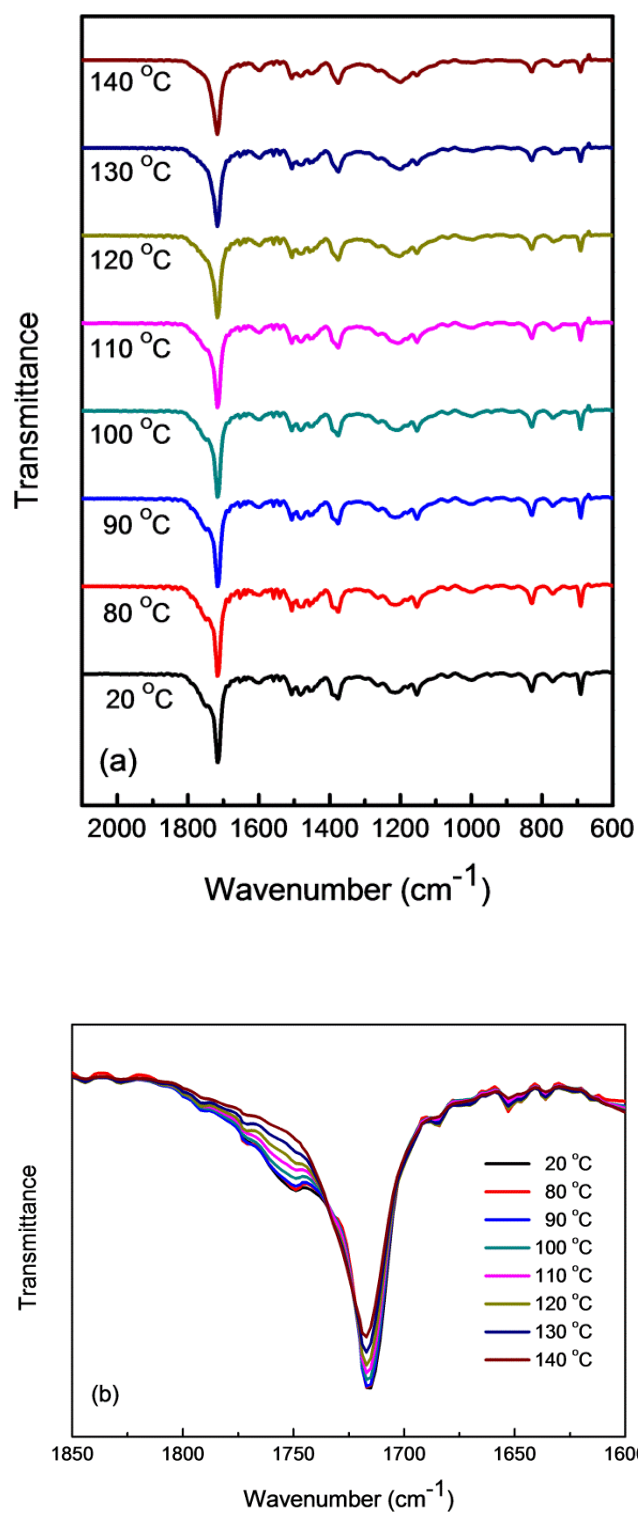

**Figure S6.** FT-IR spectra of SCP/BMI-1 film, being cured at elevated temperatures with a 10 min heating interval at each temperature.

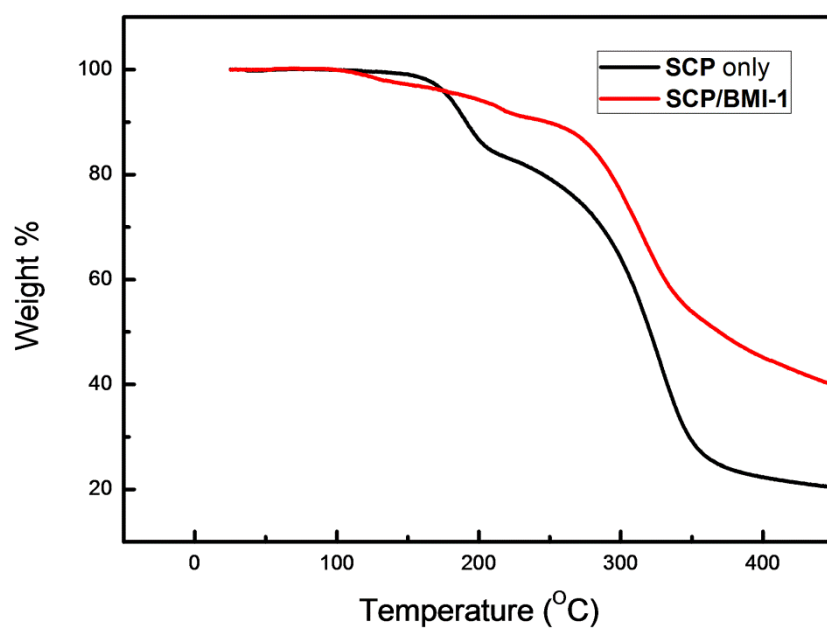

**Figure S7.** Thermal gravimetric analysis of **SCP** and **SCP/BMI-1** composite using a 2 °C /min heating rate

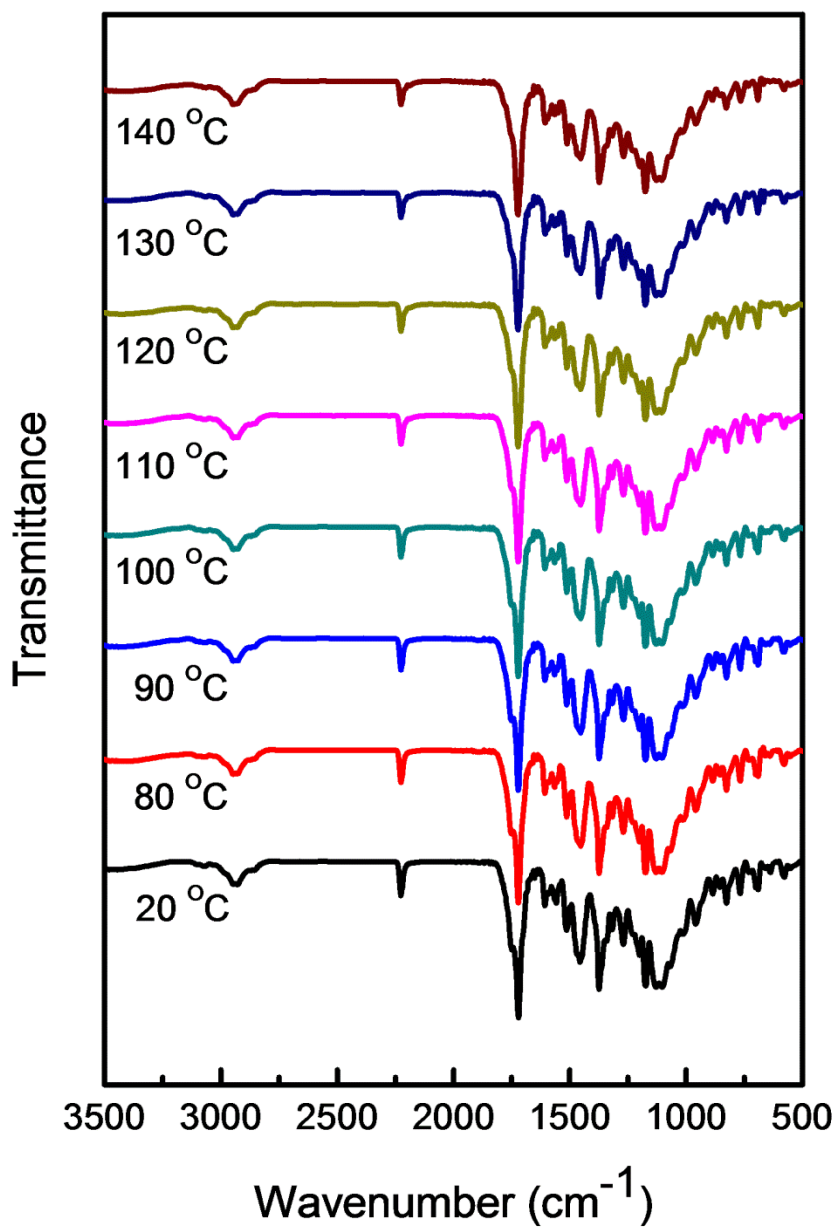

**Figure S8.** FT-IR spectra of the SCP/BMI-2/TMI film, being cured at elevated temperatures with a 10 min heating interval.
